# Supplementary material
Source: PubMed Central journal article supplement (PMC3415486)
Supplement: JB.00225-12_zjb999091854so1.pdf [file JB.00225-12_zjb999091854so1.pdf]

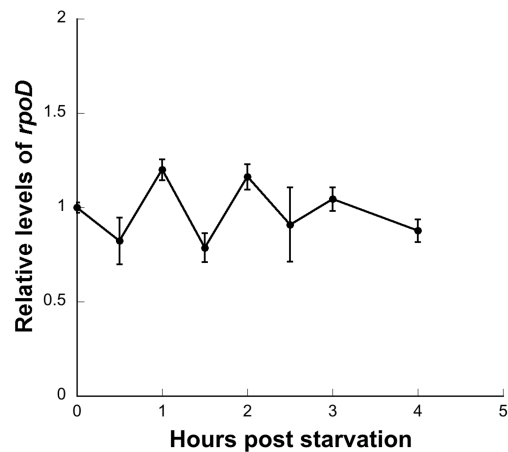

695

696 **Figure 1S. Expression of *rpoD* during early development.** QPCR was used to examine the  
697 developmental expression levels of *rpoD* in wild type (DK1622) cells. The *rpoD* mRNA levels  
698 shown are relative to those found in growing cells (0 hours). The values are means derived from  
699 three replicates. The error bars indicate standard errors of the means.

700
